# Supplementary material for: Application of multiparametric MR imaging to predict the diversification of renal function in miR29a-mediated diabetic nephropathy
Source: Sci Rep. 2021 Jan 21;11:1909. doi: 10.1038/s41598-021-81519-7 (PMC7820287; doi:10.1038/s41598-021-81519-7)
Supplement: Supplementary file 1 — Supplementary Information. [file 41598_2021_81519_MOESM1_ESM.pdf]

## Supplementary Information

### Application of Multiparametric MR Imaging to Predict the Diversification of Renal Function in miR29a-mediated Diabetic Nephropathy

Chia-Hao Su<sup>1,2†</sup>, Yung-Chien Hsu<sup>3,4†</sup> Suresh Thangudu<sup>1</sup>, Wei-Yu Chen<sup>1</sup>, Yu-Ting Huang<sup>3</sup>, Chun-Chieh Yu<sup>1</sup>, Ya-Hsueh Shih<sup>3,4</sup>, Ching-Jen Wang<sup>6,7</sup>, Chun-Liang Lin<sup>3,4,5,6\*</sup>

<sup>1</sup>Institute for Translational Research in Biomedicine, Kaohsiung Chang Gung Memorial Hospital, Kaohsiung, Taiwan.

<sup>2</sup>Department of Biomedical Imaging and Radiological Sciences, National Yang Ming University, Taipei, Taiwan.

<sup>3</sup>Departments of Nephrology, Chang Gung Memorial Hospital, Chiayi, Taiwan.

<sup>4</sup>Kidney Research Center, Chang Gung Memorial Hospital, Taipei, Taiwan.

<sup>5</sup>Colleage of Medicine, Chang Gung University, Taiwan.

<sup>6</sup>Center for Shockwave Medicine and Tissue Engineering, Department of Medical Research.

<sup>7</sup>Department of Orthopedic Surgery, Chang Gung Memorial Hospital, Kaohsiung, Taiwan

† C.-H Su and Y.-C Hsu contributed equally to this work.

\* Address for further correspondence:

Chun-Liang Lin, MD, PhD

Departments of Nephrology, Chang Gung Memorial Hospital

6 West, Chia-Pu Road, Pu-tzu City, Chiayi, Taiwan

Tel: 886-5-362-1000 Ext. 2339; Fax: 886-5-3623005

E-mail: linchunliang@adm.cgmh.org.tw

**Table S1.** The parameters of MR imaging acquisition with 9.4 T animal MR system

| Parameter of imaging acquisition            | T2WI-coronal | T2WI-axial | DCE-MRI   | DWI                           |
|---------------------------------------------|--------------|------------|-----------|-------------------------------|
| Sequence name                               | TurboRARE    | TurboRARE  | FLASH     | DtiEpi                        |
| Bandwidth                                   | 62500        | 62500      | 75000     | 250000                        |
| RARE factor                                 | 8            | 8          | -         | -                             |
| Number of segment                           | -            | -          | -         | 2                             |
| Number of repetition                        | 1            | 1          | 60        | 1                             |
| Repetition time (msec)                      | 2500         | 2500       | 33        | 2000                          |
| Echo time (msec)                            | 9.3          | 9.3        | 1.8       | 20                            |
| Effective echo time (msec)                  | 28           | 28         | -         | -                             |
| Pulse angle                                 | 180 degree   | 180 degree | 40 degree | -                             |
| Slices number                               | 11           | 21         | 3         | 3                             |
| Slice thickness (mm)                        | 0.5          | 0.5        | 0.7       | 0.7                           |
| Interslice gap (mm)                         | 0            | 0          | 0         | 0.05                          |
| Field of view (mm <sup>2</sup> )            | 30×30        | 30×30      | 30×30     | 30×30                         |
| Matrix dimension                            | 256×256      | 256×256    | 112×112   | 96×96                         |
| Spatial resolution/pixel (mm <sup>2</sup> ) | 117×117      | 117×117    | 268×268   | 312×312                       |
| Diffusion gradient duration (msec)          | -            | -          | -         | 2.5                           |
| Diffusion gradient separation (msec)        | -            | -          | -         | 8.0                           |
| B values per diffusion (s/mm <sup>2</sup> ) | -            | -          | -         | 100, 300, 500, 700, 800, 1000 |
| Number of average                           | 9            | 9          | 1         | 16                            |

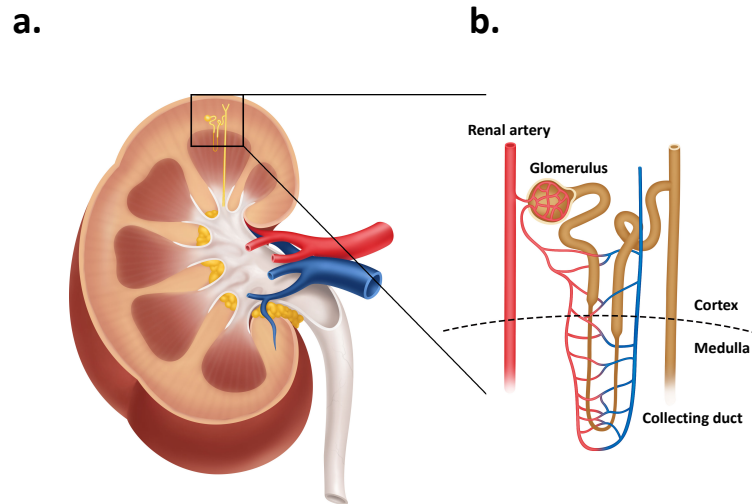

**Figure S1. Illustration of mouse kidney.** (a) anatomic coronal section of kidney. (b) schematic diagram of the nephron circulation between cortex and medulla.

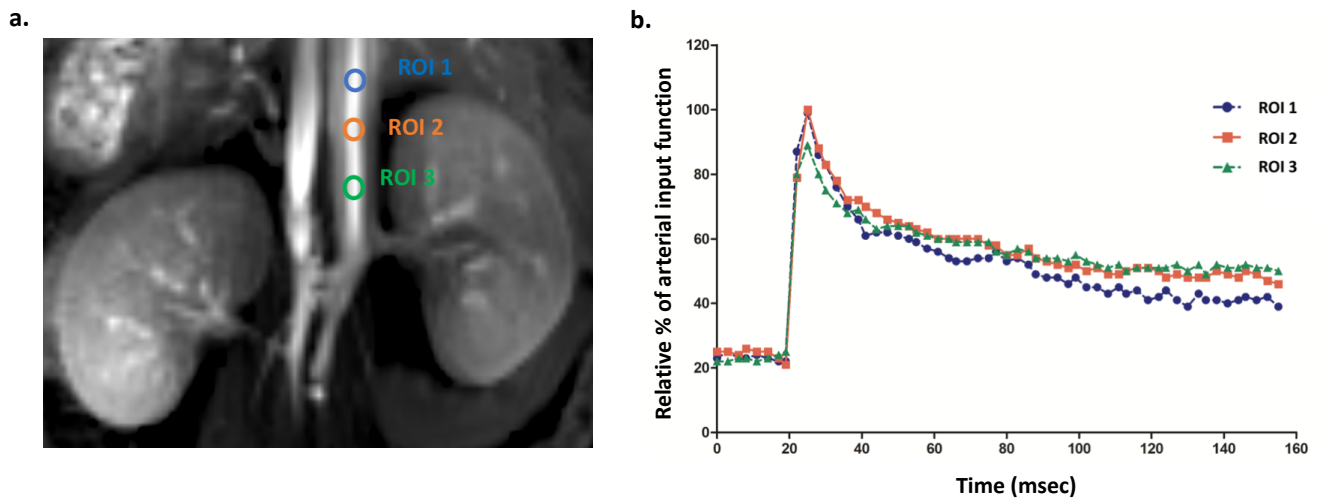

**Figure S2. Variability of AIF in DCE-MRI.** a) Regions of interest (ROI) at different area of the aorta, and b) the AIF of each ROI.

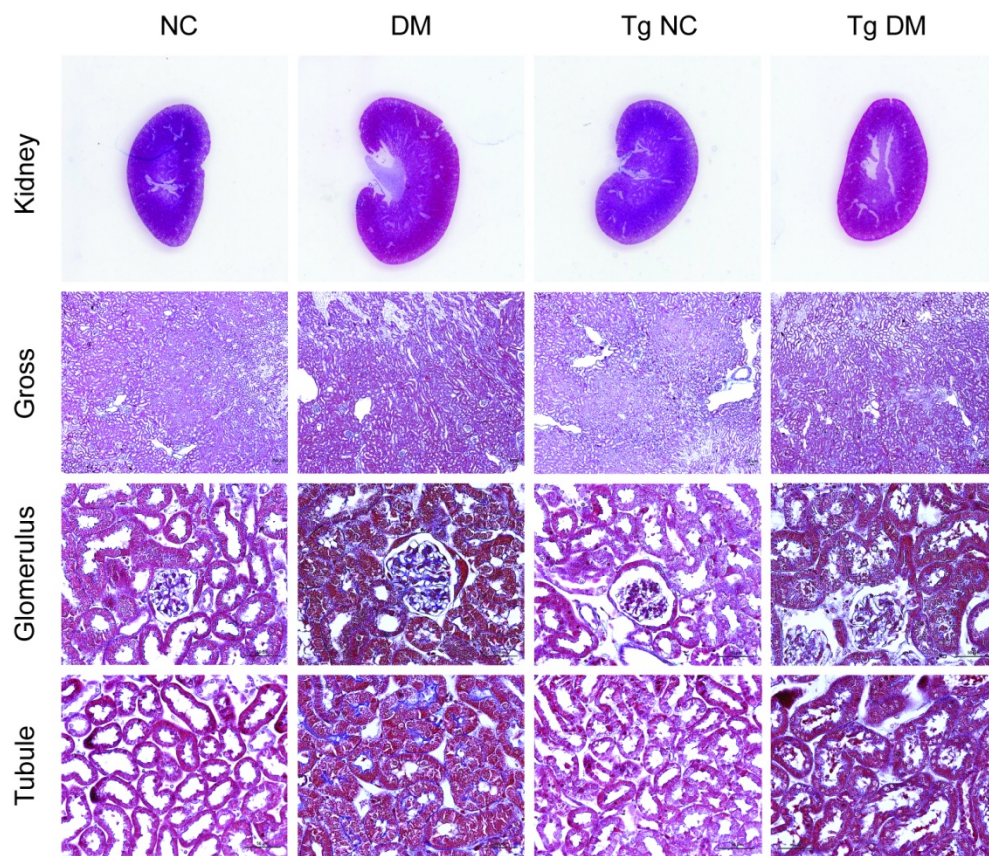

**Figure S3. Representative photographs of immunohistochemical staining of fibrotic marker (Masson's trichrome) in glomeruli and tubulointerestium of wild type mice and miR-29 transgenic mice without or with STZ treatment at 8 weeks.** Representative photomicrographs for Masson's trichrome staining of kidney sections in renal glomeruli and tubulointerestium of the wild-type (WT) and miR-29a transgenic mice (Tg) after induction of diabetes. NC, normal control; DM, diabetes.

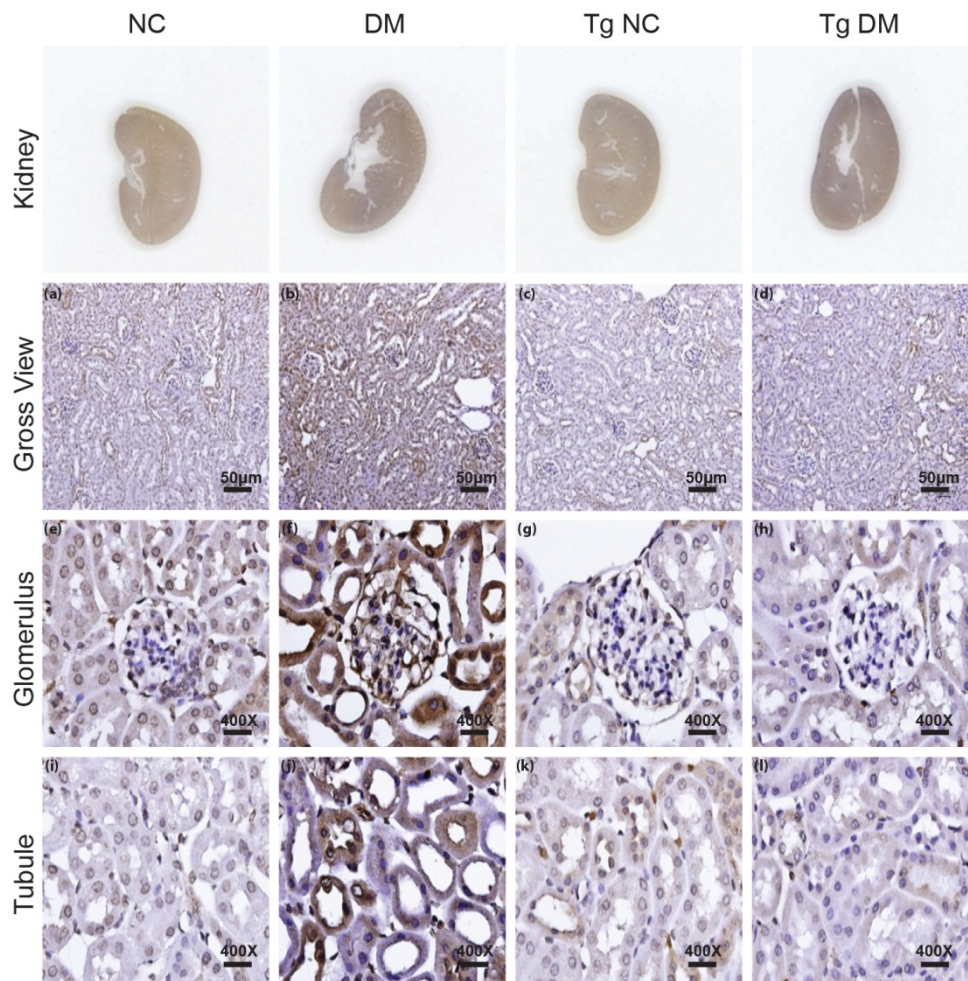

**Figure S4. Representative photographs of immunohistochemical staining of pro-fibrotic marker (TGF- $\beta$ 1) in glomeruli and tubulointerestium of wild type mice and miR-29 transgenic mice without or with STZ treatment at 8 weeks.** Representative photomicrographs for TGF- $\beta$ 1 staining of kidney sections in renal glomeruli and tubulointerestium of the wild-type (WT) and miR-29a transgenic mice (Tg) after induction of diabetes. NC, normal control; DM, diabetes.

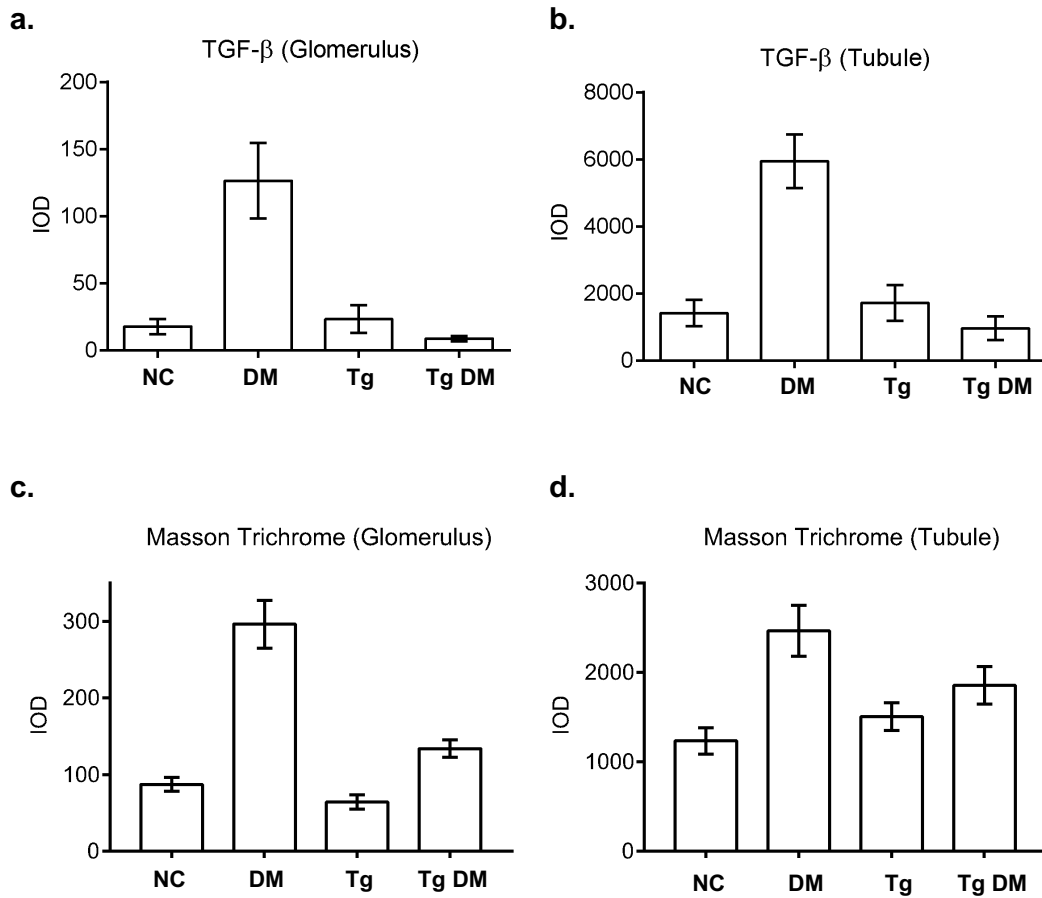

**Figure S5. Quantification of fibrotic marker with TGF-β1 and Masson's trichrome in wild type mice and miR-29 transgenic mice without or with STZ treatment at 8 weeks.** Quantification of TGF-β1 staining of kidney sections in renal glomeruli (a) and tubulointerestium (b); quantification for Masson's trichrome staining of kidney sections in the renal glomeruli (c) and tubulointerestium (d) of the wild-type (WT) and miR-29a transgenic mice (Tg) after induction of diabetes. NC, normal control; DM, diabetes.

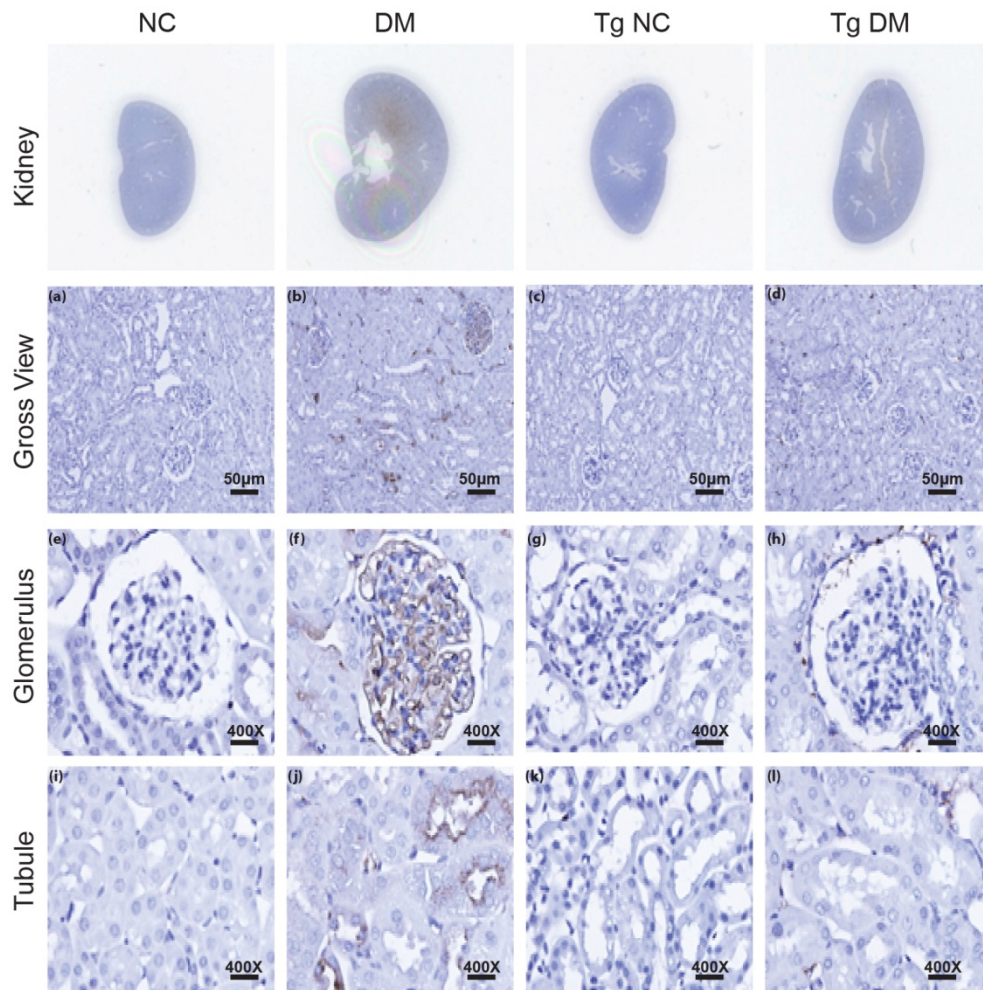

**Figure S6.** Representative photographs of immunohistochemical staining of endothelial marker CD31 in glomeruli and tubulointerestium of wild type mice and miR-29 transgenic mice without or with STZ treatment at 8 weeks. Representative photomicrographs for Masson's trichrome staining of kidney sections in renal glomeruli and tubulointerestium of the wild-type (WT) and miR-29a transgenic mice (Tg) after induction of diabetes. NC, normal control; DM, diabetes.

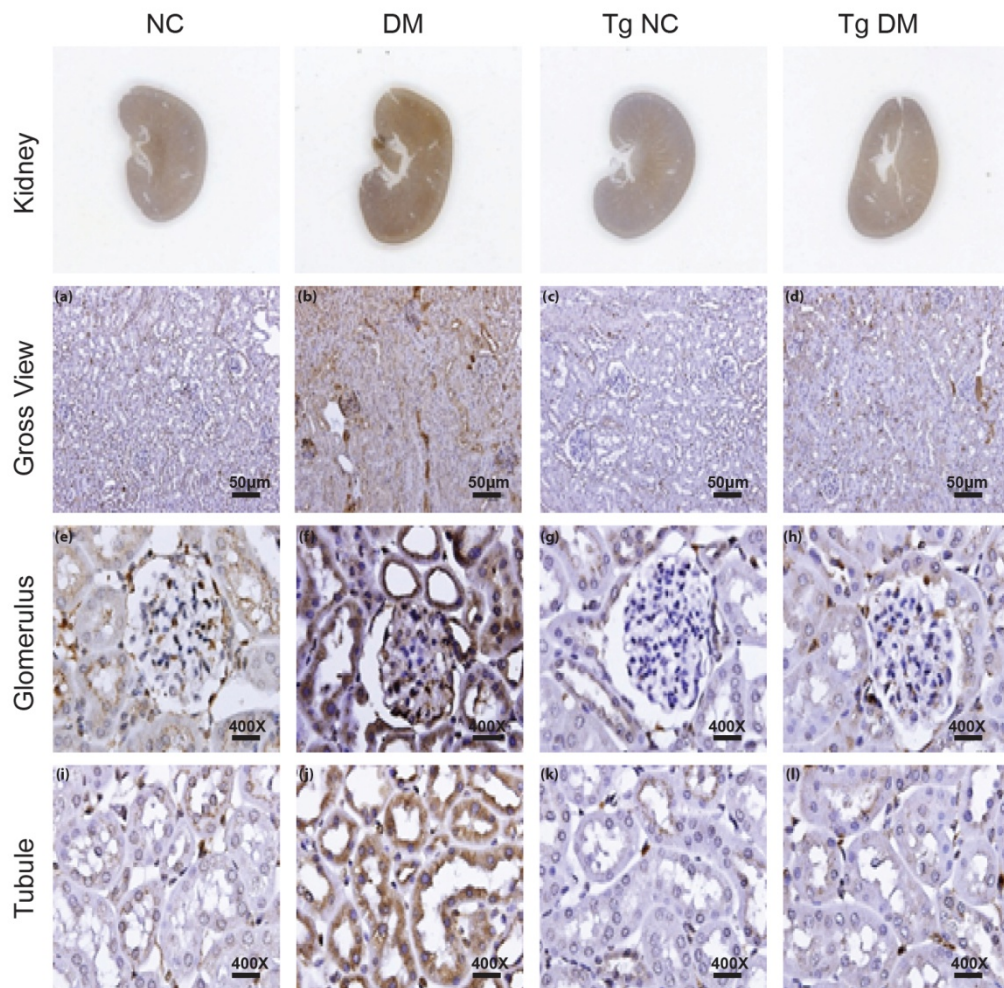

**Figure S7.** Representative photographs of immunohistochemical staining of endothelial marker (VEGF) in glomeruli and **tubulointerstitial** of wild type mice and miR-29 transgenic mice without or with STZ treatment at 8 weeks. Representative photomicrographs for VEGF staining of kidney sections in renal glomeruli and tubulointerestium of the wild-type (WT) and miR-29a transgenic mice (Tg) after induction of diabetes. NC, normal control; DM, diabetes.

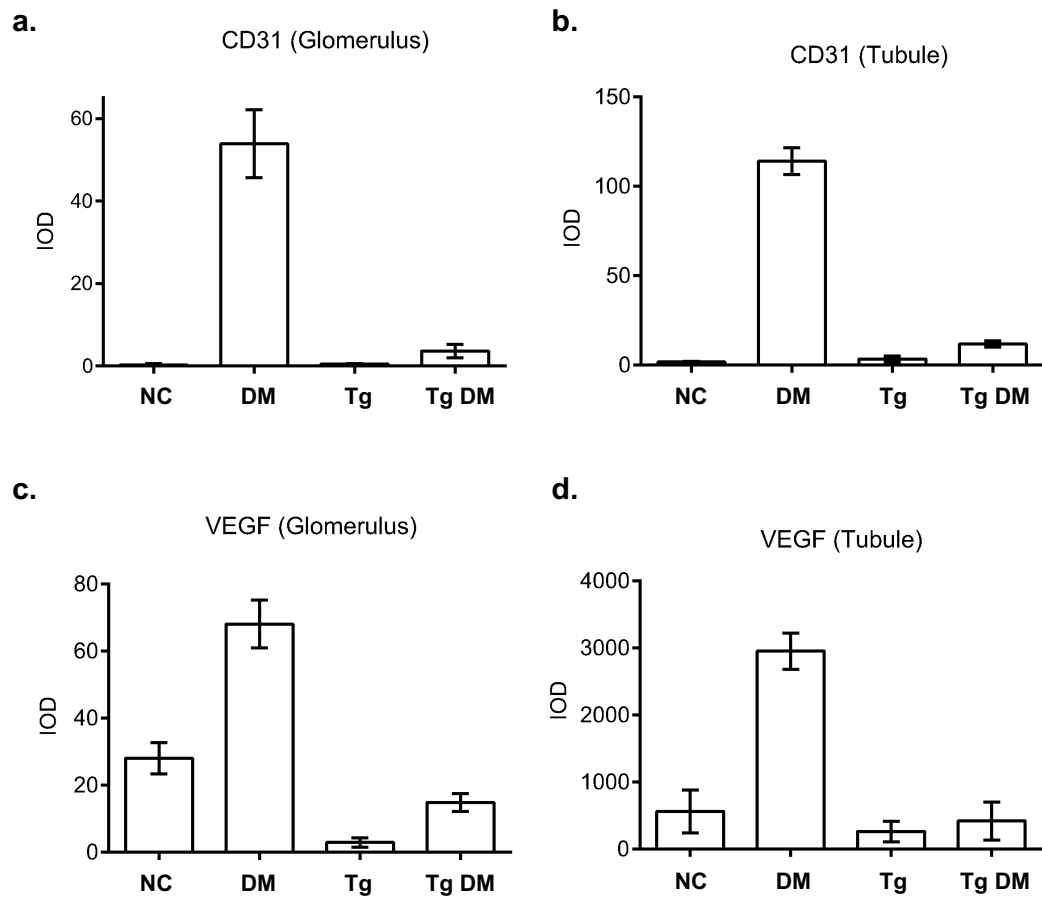

**Figure S8. Quantification of fibrotic marker with CD31 and VEGF in wild type mice and miR-29 transgenic mice without or with STZ treatment at 8 weeks.**

Quantification for CD31 staining of kidney sections in renal glomeruli (a) and tubulointerestium (b); quantification for VEGF staining of kidney sections in the renal glomeruli (c) and tubulointerestium (d) of the wild-type (WT) and miR-29a transgenic mice (Tg) after induction of diabetes. NC, normal control; DM, diabetes.
